# Supplementary material for: Neutralizing PD-L1 and PD-L2 Enhances the Efficacy of Immune Checkpoint Inhibitors in Ovarian Cancer
Source: bioRxiv or medRxiv preprint supplement (doi:10.1101/2020.01.19.911941), 2020-01-20
Supplement: Supplementary file [file media-3.pdf]

**Table S2.** Calculated changes in binding affinity and protein stability (in kcal/mol) between sPD-1 and PD-L1 with mutations within and outside of the binding interface.

| Mutations                     | d Affinity | d Stability (solvated) |
|-------------------------------|------------|------------------------|
| 8 mutations                   | -19.03     | -69.92                 |
| 7 mutations (N116S excluded ) | -20.08     | -66.99                 |
| 4 outside mutations           | -1.61      | -30.66                 |
| 3 interface mutations         | -24.78     | -30.58                 |
| 2 mutations on missing loop   | 1.31       | -12.08                 |
